# Supplementary material for: Role of Imaging in the Management of Patients with SARS-CoV-2 Lung Involvement Admitted to the Emergency Department: A Systematic Review
Source: MDPI journal article supplement (doi:10.3390/diagnostics13111856), 2023-05-26
Supplement: s1 [file s1]

## Supplementary Materials

**Table S1.** – Details of collected articles regarding the usefulness of CXR in the management of COVID-19 patients admitted to the ED.

| Title                                                                                                                                        | Year | Study type           | Geographical area* | Main aims                                                                       | Main findings                                                                                                                                                                                                | PMID     |
|----------------------------------------------------------------------------------------------------------------------------------------------|------|----------------------|--------------------|---------------------------------------------------------------------------------|--------------------------------------------------------------------------------------------------------------------------------------------------------------------------------------------------------------|----------|
| Cost-benefit analysis of portable chest radiography through glass: Initial experience at a tertiary care center during the COVID-19 pandemic | 2021 | Research article     | NA                 | Cost and benefit of through glass CXR                                           | Increase of overall cost: 9.87 USD per patient with good savings per annum                                                                                                                                   | 33875400 |
| Evaluation of Admission Chest X-Ray Findings in Patients With Respiratory Infection During the COVID-19 Pandemic                             | 2021 | Research article     | E                  | Prevalence of CXR findings in patients requiring hospitalization                | CXR abnormalities are higher in patients with confirmed COVID-19 infection                                                                                                                                   | 34692325 |
| Utility of chest radiography on admission for initial triaging of COVID-19 in symptomatic patients                                           | 2020 | Letter to the Editor | AP                 | The usefulness of the Likert scale to triage patients                           | A score higher than 4 had sensitivity and specificity of 76% and 79%                                                                                                                                         | 32904474 |
| Role of chest radiography in the management of COVID-19 pneumonia: An overview and correlation with pathophysiologic changes                 | 2021 | Research article     | AP                 | Analyze the pattern of CXR findings of suspected or confirmed COVID-19 patients | About 70% of patients had abnormal CXR findings at the admission                                                                                                                                             | 33814764 |
| Descriptive analysis of a comparison between lung ultrasound and chest radiography in patients suspected of COVID-19                         | 2021 | Research article     | E                  | Compare lung ultrasound and CXR in patients suspected of COVID-19               | <ul style="list-style-type: none"> <li>- Strong disagreement between lung ultrasound and CXR</li> <li>- Lung ultrasound seems to be better than CXR in the detection of COVID-19 lung involvement</li> </ul> | 33635443 |

|                                                                                                                                  |      |                  |    |                                                                           |                                                                                                                                                                                                                |          |
|----------------------------------------------------------------------------------------------------------------------------------|------|------------------|----|---------------------------------------------------------------------------|----------------------------------------------------------------------------------------------------------------------------------------------------------------------------------------------------------------|----------|
| Radiography-based triage for COVID-19 in the Emergency Department in a Spanish cohort of patients                                | 2022 | Research article | E  | Evaluate the outcome of the triage CXR-based system                       | - CXR was positive in 62.7%<br>- CXR can be considered an effective tool for triaging patients                                                                                                                 | 35702721 |
| Radiographic patterns on Chest X-ray as a supporting imaging tool in triaging of suspected Corona Virus Disease (COVID) patients | 2022 | Research article | AP | Evaluate the CXR pattern according to the modified Brixia scoring system  | - CXR is useful for triaging patients<br>- CXR can assess disease severity                                                                                                                                     | 35991277 |
| Diagnostic Model of COVID-19 Infection Based on the Combination of Clinical Symptoms, Chest Radiography, and Laboratory Test     | 2022 | Research article | AP | The usefulness of CXR in the quick detection of COVID-19 lung involvement | A combination of clinical, laboratory and abnormal findings on CXR can manage the isolation of patients                                                                                                        | 36156483 |
| Chest Radiograph Severity and Its Association With Outcomes in Subjects With COVID-19 Presenting to the Emergency Department     | 2022 | Research article | NA | Determine the usefulness of CXR in the prognosis of COVID-19 patients     | - Radiographic Assessment of Lung Edema (RALE) was used to classify CXRs<br>- RALE reported excellent reliability among readers<br>- Higher RALE values were associated with admission to intensive care units | 35473787 |
| Comparison of Chest Ultrasound and Standard X-Ray Imaging in COVID-19 Patients                                                   | 2020 | Research article | E  | Compare the usefulness of lung ultrasound and                             | - Lung ultrasound is useful to                                                                                                                                                                                 | 32905446 |

|                                                                                                                                |      |                  |    |                                           |                                                                                                                                                  |                                                                                                          |  |
|--------------------------------------------------------------------------------------------------------------------------------|------|------------------|----|-------------------------------------------|--------------------------------------------------------------------------------------------------------------------------------------------------|----------------------------------------------------------------------------------------------------------|--|
|                                                                                                                                |      |                  |    |                                           | CXR in the detection of COVID-19                                                                                                                 | detect the interstitial syndrome<br>- Lung ultrasound reported higher sensitivity in comparison with CXR |  |
| Chest X-ray in the emergency department during COVID-19 pandemic descending phase in Italy: correlation with patients' outcome | 2021 | Research article | E  | Diagnostic values of CXR at the admission | - CXR showed 83% and 60% of sensitivity and specificity<br>- GGOs and diffuse distribution were independent predictors of COVID-19 diagnosis     | 33394364                                                                                                 |  |
| Diagnostic and Prognostic Value of Chest Radiographs for COVID-19 at Presentation                                              | 2020 | Research article | AP | Diagnostic and prognostic values of CXR   | - RALE score failed to identify COVID-19 patients<br>- A high RALE score was associated with a worse prognosis                                   | 32970556                                                                                                 |  |
| Chest X-ray features of SARS-CoV-2 in the emergency department: a multicenter experience from northern Italian hospitals       | 2020 | Research article | E  | Diagnosis of COVID-19                     | - GGOs and interstitial opacities are the main COVID-19 findings in lung involvement<br>- Symptom onset is associated with abnormal CXR findings | 32469732                                                                                                 |  |

|                                                                                                                                                                    |      |                  |   |                            |                                                                                                                                          |          |
|--------------------------------------------------------------------------------------------------------------------------------------------------------------------|------|------------------|---|----------------------------|------------------------------------------------------------------------------------------------------------------------------------------|----------|
| Diagnostic impact of bedside chest X-ray features of 2019 novel coronavirus in the routine admission at the emergency department: case series from Lombardy region | 2020 | Research article | E | Diagnostic accuracy of CXR | - Sensitivity and specificity were 57% and 89%<br>- Sensitivity was higher for patients with symptom onset > 5 days compared to ≤ 5 days | 32485335 |
|--------------------------------------------------------------------------------------------------------------------------------------------------------------------|------|------------------|---|----------------------------|------------------------------------------------------------------------------------------------------------------------------------------|----------|

SA: South America, N: North America, E: Europe, AP: Asia-Pacific, PMID: PubMed IDentifier.

\*according to the first Author's affiliation.

**Table S2.** – Details of collected articles regarding the usefulness of chest CT in the management of COVID-19 patients admitted to the ED.

| Title                                                                                                                     | Year | Study type       | Geographical area* | Main aims                                                  | Main findings                                                                                                                                                                                                                           | PMID     |
|---------------------------------------------------------------------------------------------------------------------------|------|------------------|--------------------|------------------------------------------------------------|-----------------------------------------------------------------------------------------------------------------------------------------------------------------------------------------------------------------------------------------|----------|
| Ruling out COVID-19 by chest CT at emergency admission when prevalence is low: the prospective, observational SCOUT study | 2021 | Research article | E                  | CT as a rule-out tool                                      | <ul style="list-style-type: none"> <li>- Sensitivity and specificity were 84.6% and 94.7%</li> <li>- PPV and NVP were 57.9% and 98.6%</li> <li>- CT can be used as a complementary tool for early COVID-19 exclusion</li> </ul>         | 33435973 |
| Impact of the COVID pandemic on emergency department CT utilization: where do we go from here?                            | 2022 | Research article | NA                 | Analyze the impact of COVID-19 on CT utilization in the ED | Significant increase in CT utilization before and after pandemic periods (35.9 CTs per 100 visits to 41.8 per 100 visits, respectively)                                                                                                 | 35729442 |
| Chest CT in the emergency department for suspected COVID-19 pneumonia                                                     | 2021 | Research article | E                  | Diagnostic values of CT                                    | <ul style="list-style-type: none"> <li>- CT can help classify patients into "highly likely", "likely" and "unlikely" COVID-19</li> <li>- CT specificity, sensitivity, PPV, and NPV were 76%, 99%, 90%, and 97%, respectively</li> </ul> | 33165767 |
| Computed Tomography Pulmonary Angiography Utilization in the                                                              | 2022 | Research article | NA                 | - Evaluate the order of CTPA                               | - CTPA demand increased by 62%                                                                                                                                                                                                          | 35749621 |

|                                                                                                                                                          |      |                  |    |                                                                                                                                           |                                                                                                                                                                                                                                                |          |
|----------------------------------------------------------------------------------------------------------------------------------------------------------|------|------------------|----|-------------------------------------------------------------------------------------------------------------------------------------------|------------------------------------------------------------------------------------------------------------------------------------------------------------------------------------------------------------------------------------------------|----------|
| Emergency Department During the COVID-19 Pandemic                                                                                                        |      |                  |    | <ul style="list-style-type: none"> <li>- during the pandemic</li> <li>- Evaluate if COVID-19 patients were more affected by PE</li> </ul> | <ul style="list-style-type: none"> <li>- Detection of PE remained stable</li> <li>- COVID-19 is not a predictor of PE at ED admittance</li> </ul>                                                                                              |          |
| Radiation dose levels in chest computed tomography scans of coronavirus disease 2019 pneumonia: A survey of 2119 patients in Chongqing, southwest China  | 2021 | Research article | AP | <ul style="list-style-type: none"> <li>- Evaluation of radiation dose exposure in terms of effective dose</li> </ul>                      | <ul style="list-style-type: none"> <li>- The median effective dose was 4.55 mSv (range 0.11-15.3)</li> <li>- The median number of CT scans for patient was 4</li> <li>- The mean interval between CT scans was 7 days</li> </ul>               | 34397803 |
| Diagnostic performance of low-dose chest CT to detect COVID-19: A Turkish population study                                                               | 2021 | Research article | AP | <ul style="list-style-type: none"> <li>- Diagnostic performance of low-dose CT in the detection of COVID-19 abnormalities</li> </ul>      | <ul style="list-style-type: none"> <li>- The sensitivity, specificity, PPV, and NPV of the initial scan were 90.4%, 64.2%, 91.8%, and 60%, respectively</li> <li>- Typical CT findings should be considered more reliable than NAAT</li> </ul> | 32876571 |
| Coronavirus disease 2019 (COVID-19): chest CT characteristics benefit to early disease recognition and patient classification-a single center experience | 2020 | Research article | AP | <ul style="list-style-type: none"> <li>- Role of CT in screening patients</li> </ul>                                                      | <ul style="list-style-type: none"> <li>- CT abnormalities can occur in the early stage of COVID-19 when NAAT is negative</li> <li>- CT can help with the rapid</li> </ul>                                                                      | 32617299 |

|                                                                                                                                               |      |                  |    |                                                                     |                                                                                                                                                                                       |          |
|-----------------------------------------------------------------------------------------------------------------------------------------------|------|------------------|----|---------------------------------------------------------------------|---------------------------------------------------------------------------------------------------------------------------------------------------------------------------------------|----------|
|                                                                                                                                               |      |                  |    |                                                                     | diagnosis and management of patients                                                                                                                                                  |          |
| Quantitative Computed Tomography Parameters in Coronavirus Disease 2019 Patients and Prediction of Respiratory Outcomes Using a Decision Tree | 2022 | Research article | AP | Role of quantitative CT parameters in classifying COVID-19 patients | - The amount of GGOs is linked to the respiratory outcome<br>- CT quantitative parameters increase accuracy in predicting the outcome                                                 | 35669915 |
| Accuracy and Reproducibility of Low-Dose Submillisievert Chest CT for the Diagnosis of COVID-19                                               | 2020 | Research article | E  | Evaluate the accuracy of low-dose CT in the diagnosis of COVID-19   | - Excellent sensitivity, specificity, PPV, NPV, and accuracy (86.7%, 93.6%, 91.1%, 90.3%, and 90.2%)<br>- CT abnormal findings increase the likelihood of disease from 43.2% to 91.4% | 33778576 |
| Comparing the sensitivity and specificity of lung CT-scan with RT-PCR for diagnosis of COVID-19                                               | 2022 | Research article | AP | Comparison between CT and NAAT in the diagnosis of COVID-19         | - Sensitivity, specificity, PPV, and NPV for CT were 94.5%, 24.7%, 40.7, and 89.1%<br>- CT has a better diagnostic value in comparison with NAAT                                      | 35726406 |

SA: South America, N: North America, E: Europe, AP: Asia-Pacific, PMID: PubMed Identifier.

\*according to the first Author's affiliation.

**Table S3.** – Details of collected articles regarding the role of LUS in the management of COVID-19 patients admitted to the ED.

| Title                                                                                                          | Year | Study type                                 | Geograph-<br>ical area* | Main aims                                                                                                                                              | Main findings                                                                                                                                                                             | PMID     |
|----------------------------------------------------------------------------------------------------------------|------|--------------------------------------------|-------------------------|--------------------------------------------------------------------------------------------------------------------------------------------------------|-------------------------------------------------------------------------------------------------------------------------------------------------------------------------------------------|----------|
| Feasibility of using point-of-care lung ultrasound for early triage of COVID-19 patients in the emergency room | 2020 | Research article                           | E                       | Feasibility of LUS for early triage patients with suspected COVID-19 infection                                                                         | LUS may provide an early ED triage method for evaluating possible COVID-19 infections. Due to limited specificity, positive LUS findings should be confirmed with NAAT or CT              | 32910323 |
| Lung Ultrasound as a Triage Method in Primary Care for Patients with Suspected SARS-CoV-2 Pneumonia            | 2022 | Research article                           | E                       | Usefulness of LUS to triage patients with suspected COVID-19 infection                                                                                 | Due to its high sensitivity and NPV, LUS is useful as a triage tool for patients with suspected COVID pneumonia                                                                           | 36362647 |
| Lung ultrasound for the early diagnosis of COVID-19 pneumonia: an international multicenter study              | 2021 | Multicenter observational research article | E, N                    | Evaluate the application diagnostic approach based on a combination of LUS findings with patient's symptoms and clinical history in suspected patients | Higher patterns of LUS likelihood of COVID-19 pneumonia showed a high overall sensitivity in identifying patients with positive NAAT, particularly in those with severe clinical symptoms | 33743018 |
| Lung Ultrasonography for the Diagnosis of SARS-CoV-2 Pneumonia in the Emergency Department                     | 2020 | Research article                           | E                       | Evaluate the sensitivity of an integrated LUS-clinical evaluation approach in the ED                                                                   | A LUS-clinical integrated assessment showed higher sensitivity and specificity than NAAT                                                                                                  | 33461884 |



|                                                                                                                                                         |      |                   |   |                                                                                                                                     |                                                                                                                                                                            |
|---------------------------------------------------------------------------------------------------------------------------------------------------------|------|-------------------|---|-------------------------------------------------------------------------------------------------------------------------------------|----------------------------------------------------------------------------------------------------------------------------------------------------------------------------|
|                                                                                                                                                         |      |                   |   | comparing it with NAAT                                                                                                              |                                                                                                                                                                            |
| The role of lung ultrasound as a frontline diagnostic tool in the era of COVID-19 outbreak                                                              | 2020 | Research article  | E | Assess the diagnostic accuracy of LUS for COVID-19 pneumonia in a cohort of symptomatic patients admitted to the ED                 | LUS had good values of sensitivity and PNV and slightly lower values of specificity and NPV<br>33090353                                                                    |
| Lung ultrasound findings are associated with mortality and need for intensive care admission in covid-19 patients evaluated in the emergency department | 2020 | Research article  | E | Evaluate the ability of LUS to predict mortality and intensive care unit admission of COVID-19 patients at the time of ED admission | The number of involved lung areas and the LUS-based severity score were significantly associated with a higher risk of intensive care unit admission and death<br>32798003 |
| Lung ultrasound: a valuable tool for assessing COVID-19 patients with different severity                                                                | 2022 | Research article  | A | Correlate a LUS-based score system with disease severity                                                                            | LUS scores were capable of discriminating severely and critically ill from moderately ill patients (AUC = 0.948)<br>34935689                                               |
| What is the diagnostic accuracy of chest radiography, ultrasound, and computed tomography for COVID-19?                                                 | 2022 | Systematic review | N | Compare diagnostic values CXR, LUS, and CT for COVID-19 diagnosis                                                                   | CXR, LUS, and chest CT showed all moderate sensitivity with the lowest specificity for LUS<br>34353652                                                                     |
| Comparison of admission chest computed tomography and lung ultrasound performance for diagnosis of COVID-19 pneumonia in                                | 2020 | Research article  | E | Compare diagnostic performance of admission CT and LUS                                                                              | - Admission CT showed better accuracy than LUS for COVID-19 diagnosis<br>33091835                                                                                          |

| populations with different disease prevalence                                                       |      |                  |   | for the diagnosis of COVID-19                                                         | - LUS had high but low specificity                     |          |
|-----------------------------------------------------------------------------------------------------|------|------------------|---|---------------------------------------------------------------------------------------|--------------------------------------------------------|----------|
| Point-of-care Lung Ultrasound Is More Sensitive than Chest Radiograph for Evaluation of COVID-19    | 2020 | Research article | N | Compare diagnostic performance of LUS and CXR for the diagnosis of COVID-19           | LUS was more sensitive than CXR                        | 32726240 |
| Comparison of Lung Ultrasound versus Chest X-ray for Detection of Pulmonary Infiltrates in COVID-19 | 2021 | Research article | E | Assess the correlation between LUS and CXR for detecting lung infiltrates in COVID-19 | LUS detected pulmonary infiltrates more often than CXR | 33671699 |

SA: South America, N: North America, E: Europe, A: Asia-Pacific, Af: Africa, PMID: PubMed Identifier.

\*according to the first Author's affiliation.

**Table S4.** – Details of collected articles regarding the role of AI in the management of COVID-19 patients admitted to the ED.

| Title                                                                                                                                           | Year | Study type       | Geographical area* | Main aims                                                                                                                                               | Main findings                                                                                                                                           | PMID     |
|-------------------------------------------------------------------------------------------------------------------------------------------------|------|------------------|--------------------|---------------------------------------------------------------------------------------------------------------------------------------------------------|---------------------------------------------------------------------------------------------------------------------------------------------------------|----------|
| Deep learning-based triage and analysis of lesion burden for COVID-19: a retrospective study with external validation                           | 2020 | Research article | A                  | Develop a deep learning algorithm based on chest CT imaging for rapid COVID-19 triaging                                                                 | In an external validation set, the AI triage algorithm achieved an area under the curve of 0.953 and a median time of 0.55 min to alert a positive case | 32984796 |
| Artificial intelligence-enabled rapid diagnosis of patients with COVID-19                                                                       | 2020 | Research article | N, A               | Test AI algorithms to integrate chest CT findings with clinical symptoms, exposure history and laboratory testing to rapidly diagnose COVID-19 patients | The AI model achieved an AUC of 0.92 and showed comparable sensitivity to a senior thoracic radiologist                                                 | 32427924 |
| Integrated model for COVID-19 diagnosis based on computed tomography artificial intelligence, and clinical features: a multicenter cohort study | 2020 | Research article | A                  | Test a machine learning diagnostic model based on CT imaging and clinical features                                                                      | The model achieved an AUC of 0.91                                                                                                                       | 35284557 |
| AI-assisted CT imaging analysis for COVID-19 screening: Building and deploying a medical AI system                                              | 2021 | Research article | A                  | Propose an AI-based system for automatically detect COVID-19 from CT scan images                                                                        | - The system achieved a sensitivity of 0.98<br>- The system reduced physicians detection time                                                           | 33199977 |

|                                                                                                                             |      |                  |   |                                                                                                                   |                                                                                                                                                                               |          |
|-----------------------------------------------------------------------------------------------------------------------------|------|------------------|---|-------------------------------------------------------------------------------------------------------------------|-------------------------------------------------------------------------------------------------------------------------------------------------------------------------------|----------|
| Deployment of artificial intelligence for radiographic diagnosis of COVID-19 pneumonia in the emergency department          | 2020 | Research article | N | Test the possible role of an AI algorithm based on CXR in the ED workflow                                         | In the 20% of cases the AI algorithm impacted emergency physician clinical decision-making                                                                                    | 33392549 |
| Application of deep learning for fast detection of COVID-19 in X-Rays using nCOVnet                                         | 2020 | Research article | A | Propose a deep learning neural network-based method for fast screening COVID-19 patient by analyzing CXR          | The model showed a sensitivity of 97.62% and specificity of 78.57%                                                                                                            | 32536759 |
| Development and prospective validation of COVID-19 chest X-ray screening model for patients attending emergency departments | 2021 | Research article | E | Propose an AI algorithm to differentiate normal, abnormal, non-COVID-19 pneumonia, and COVID-19 pneumonia on CXRs | - The algorithm achieved an AUC for COVID-19 of 0.86, with a sensitivity of 83%<br>- The diagnostic performance was comparable with that of four board-certified radiologists | 34650190 |

SA: South America, N: North America, E: Europe, A: Asia-Pacific, Af: Africa, PMID: PubMed Identifier.

\*according to the first Author's affiliation.
